# Supplementary material for: Synthesis of thia-Michael-Type Adducts between Naphthoquinones and N-Acetyl-L-Cysteine and Their Biological Activity
Source: MDPI journal article supplement (doi:10.3390/molecules27175645), 2022-09-01
Supplement: s1 [file s1]

# Synthesis and biological activity of thia-Michael-type adducts between naphthoquinones and *N*-acetyl-*L*-cysteine

Gabriele Micheletti<sup>1\*</sup>, Carla Boga<sup>1</sup>, Chiara Zalambani<sup>2</sup>, Giovanna Farruggia<sup>2</sup>, Erika Esposito<sup>3</sup>, Jessica Fiori<sup>3</sup>, Nicola Rizzardi<sup>2</sup>, Paola Taddei<sup>4</sup>, Michele Di Foggia<sup>4</sup>, and Natalia Calonghi<sup>2\*</sup>

<sup>1</sup> Department of Industrial Chemistry 'Toso Montanari', Alma Mater Studiorum - Università di Bologna Viale Del Risorgimento 4, 40136 Bologna Italy; gabriele.micheletti@unibo.it (GM), carla.boga@unibo.it (CB).

<sup>2</sup> Department of Pharmacy and Biotechnology, University of Bologna, Bologna (Italy); natalia.calonghi@unibo.it (NC), zalachiara@hotmail.it (CZ), nicola.rizzardi2@unibo.it (NR).

<sup>3</sup> Department of Chemistry 'G. Ciamician', Alma Mater Studiorum - Università di Bologna, via Selmi 2, 40126 Bologna (Italy); erika.esposito8@unibo.it (EE), jessica.fiori@unibo.it (JF).

<sup>4</sup> Department of Biomedical and Neuromotor Sciences, Alma Mater Studiorum - Università di Bologna, via Irnerio 48, 40126 Bologna (Italy); paola.taddei@unibo.it (PT), michele.difoggia.2@unibo.it (MF).

|                                                                                      |         |
|--------------------------------------------------------------------------------------|---------|
| <sup>1</sup> HNMR spectrum of compound <b>8</b>                                      | Page 1  |
| <sup>13</sup> CNMR spectrum of compound <b>8</b>                                     | Page 2  |
| ESI-MS spectrum of compound <b>8</b>                                                 | Page 3  |
| <sup>1</sup> HNMR spectrum of compound <b>9</b>                                      | Page 4  |
| <sup>13</sup> CNMR spectrum of compound <b>9</b>                                     | Page 5  |
| ESI-MS spectrum of compound <b>9</b>                                                 | Page 6  |
| <sup>1</sup> HNMR spectrum of compound <b>10</b>                                     | Page 7  |
| <sup>13</sup> CNMR spectrum of compound <b>10</b>                                    | Page 8  |
| ESI-MS spectrum of compound <b>10</b>                                                | Page 9  |
| <sup>1</sup> HNMR spectrum of compound <b>11</b>                                     | Page 10 |
| <sup>13</sup> CNMR spectrum of compound <b>11</b>                                    | Page 11 |
| ESI-MS spectrum of compound <b>11</b>                                                | Page 12 |
| <sup>1</sup> HNMR spectrum of compound <b>12</b>                                     | Page 13 |
| <sup>13</sup> CNMR spectrum of compound <b>12</b>                                    | Page 14 |
| ESI-MS spectrum of compound <b>12</b>                                                | Page 15 |
| Direct infusion mass spectra of the reaction mixtures with GSH of compound <b>8</b>  | Page 16 |
| Direct infusion mass spectra of the reaction mixtures with GSH of compound <b>9</b>  | Page 17 |
| Direct infusion mass spectra of the reaction mixtures with GSH of compound <b>11</b> | Page 18 |

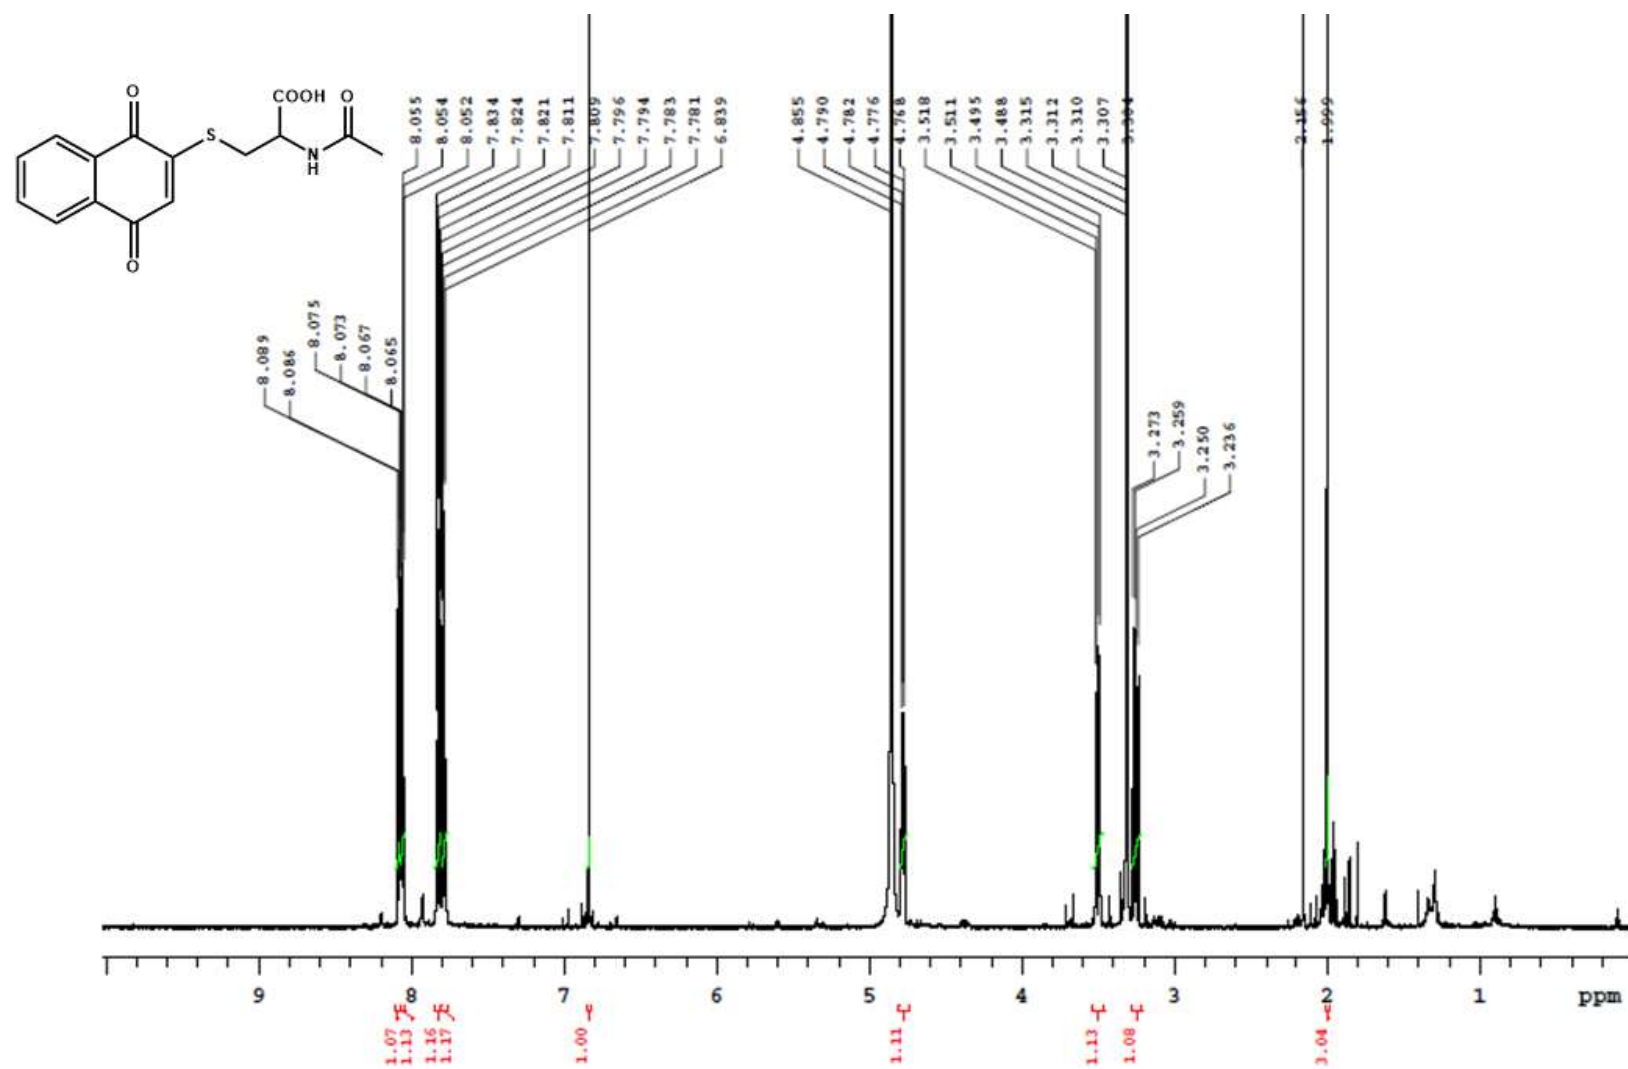

Figure S1. <sup>1</sup>H NMR spectrum in CD<sub>3</sub>OD of compound 8.

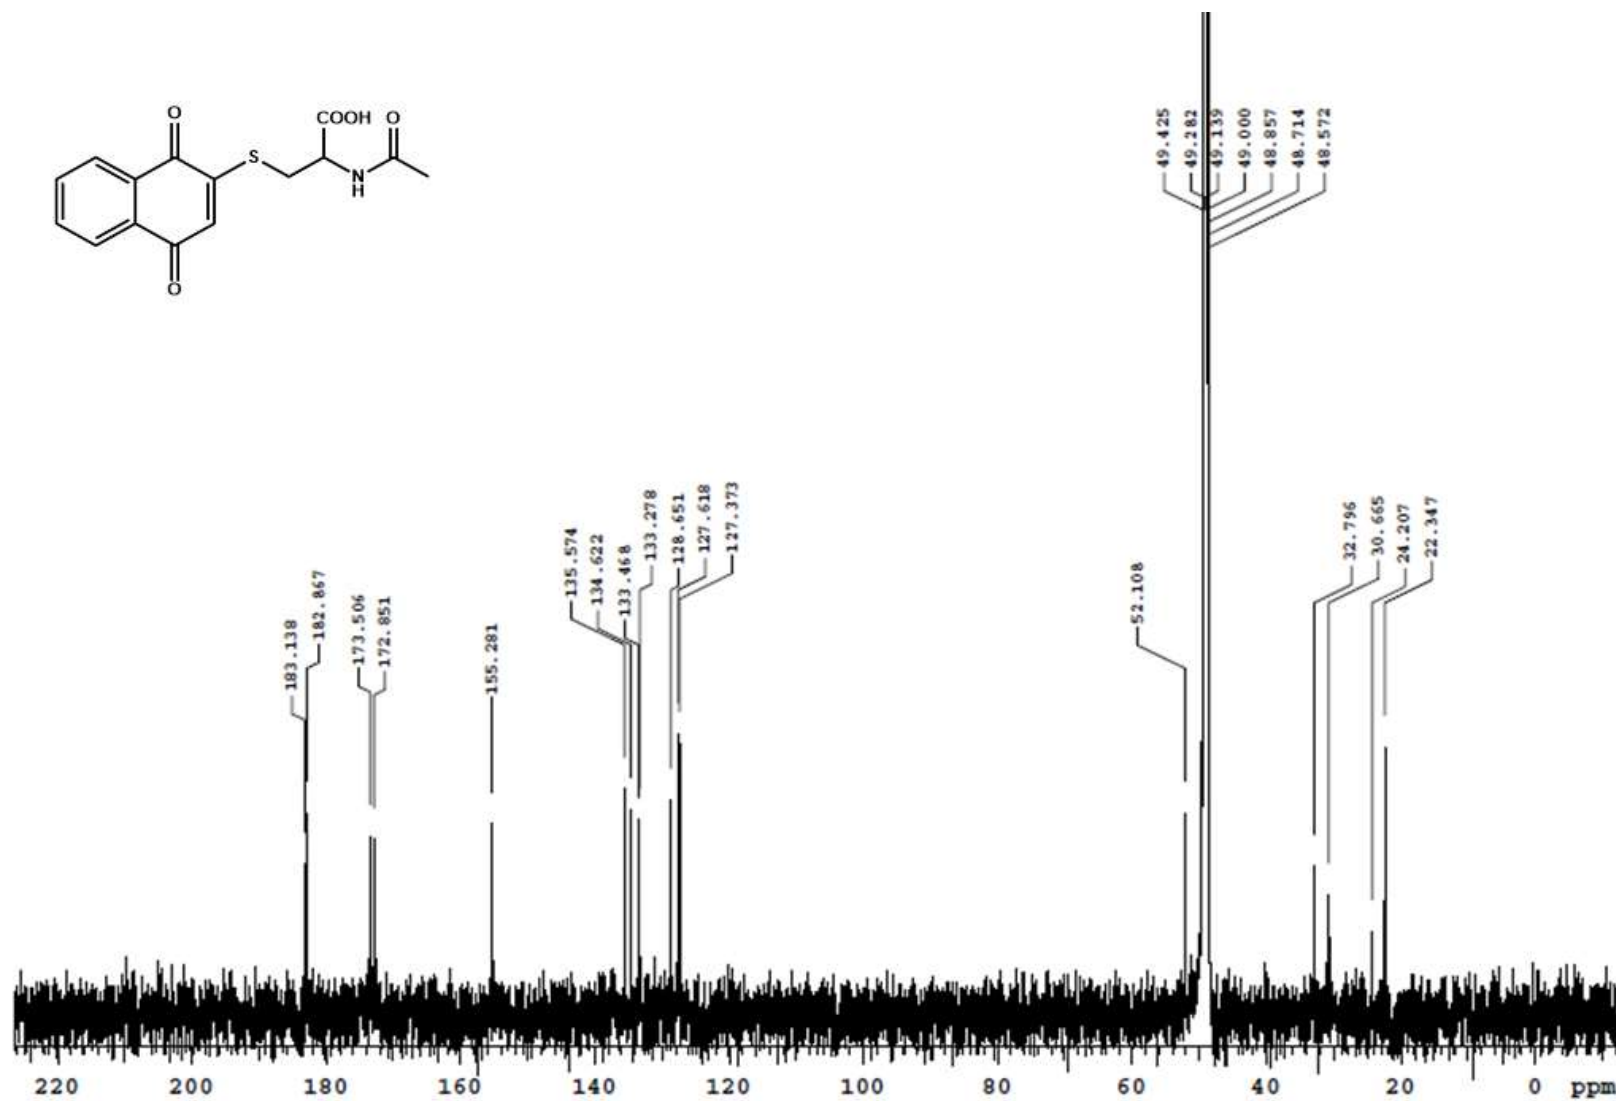

Figure S2. <sup>13</sup>C NMR spectrum in CD<sub>3</sub>OD of compound 8.

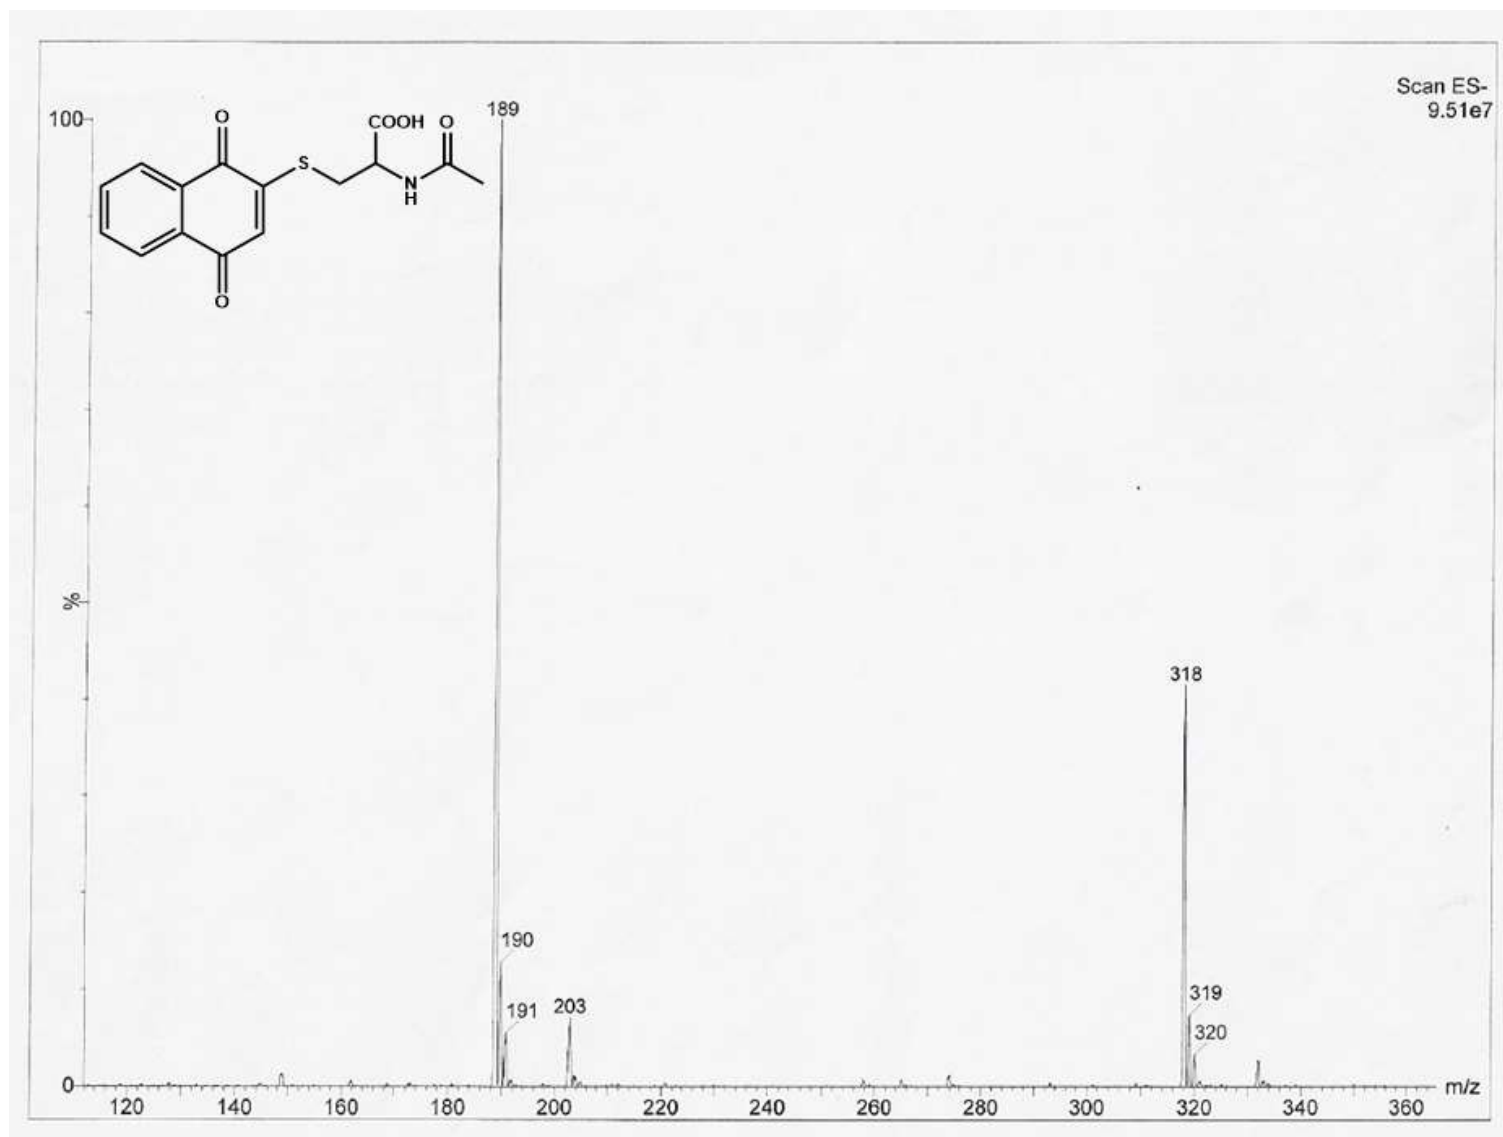

**Figure S3.** ESI-MS<sup>-</sup> spectrum of compound 8.

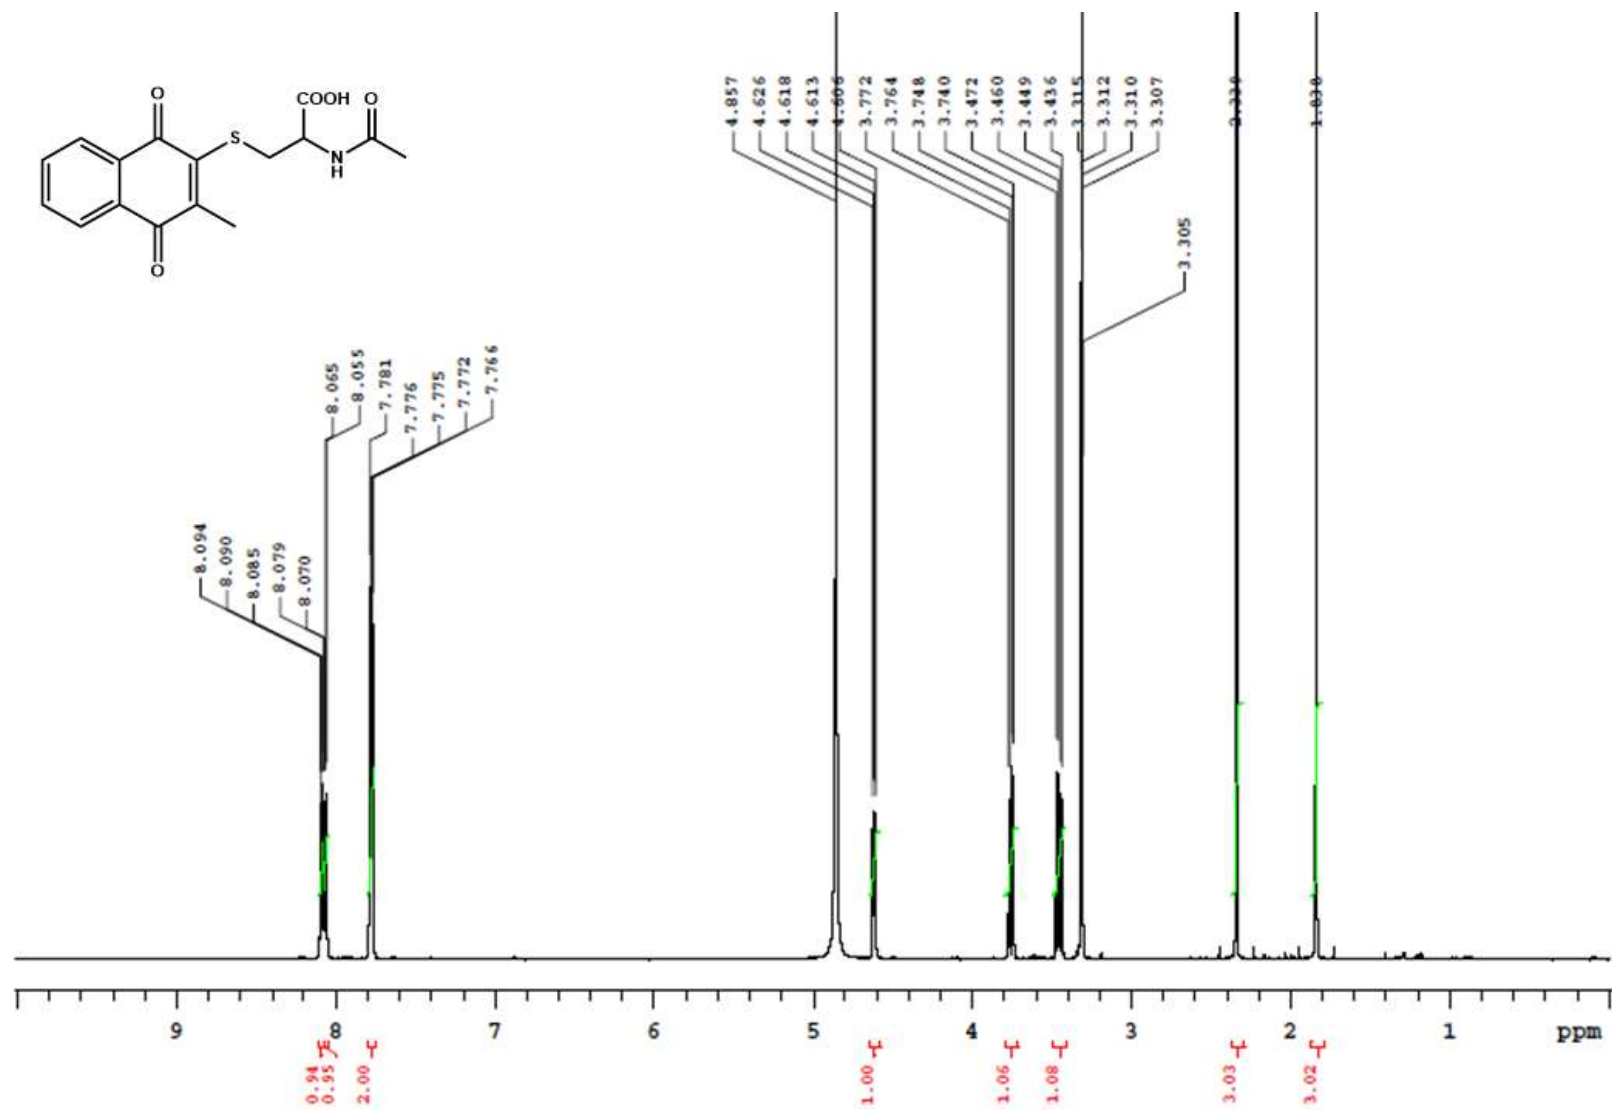

Figure S4. <sup>1</sup>H NMR spectrum in CD<sub>3</sub>OD of compound 9.

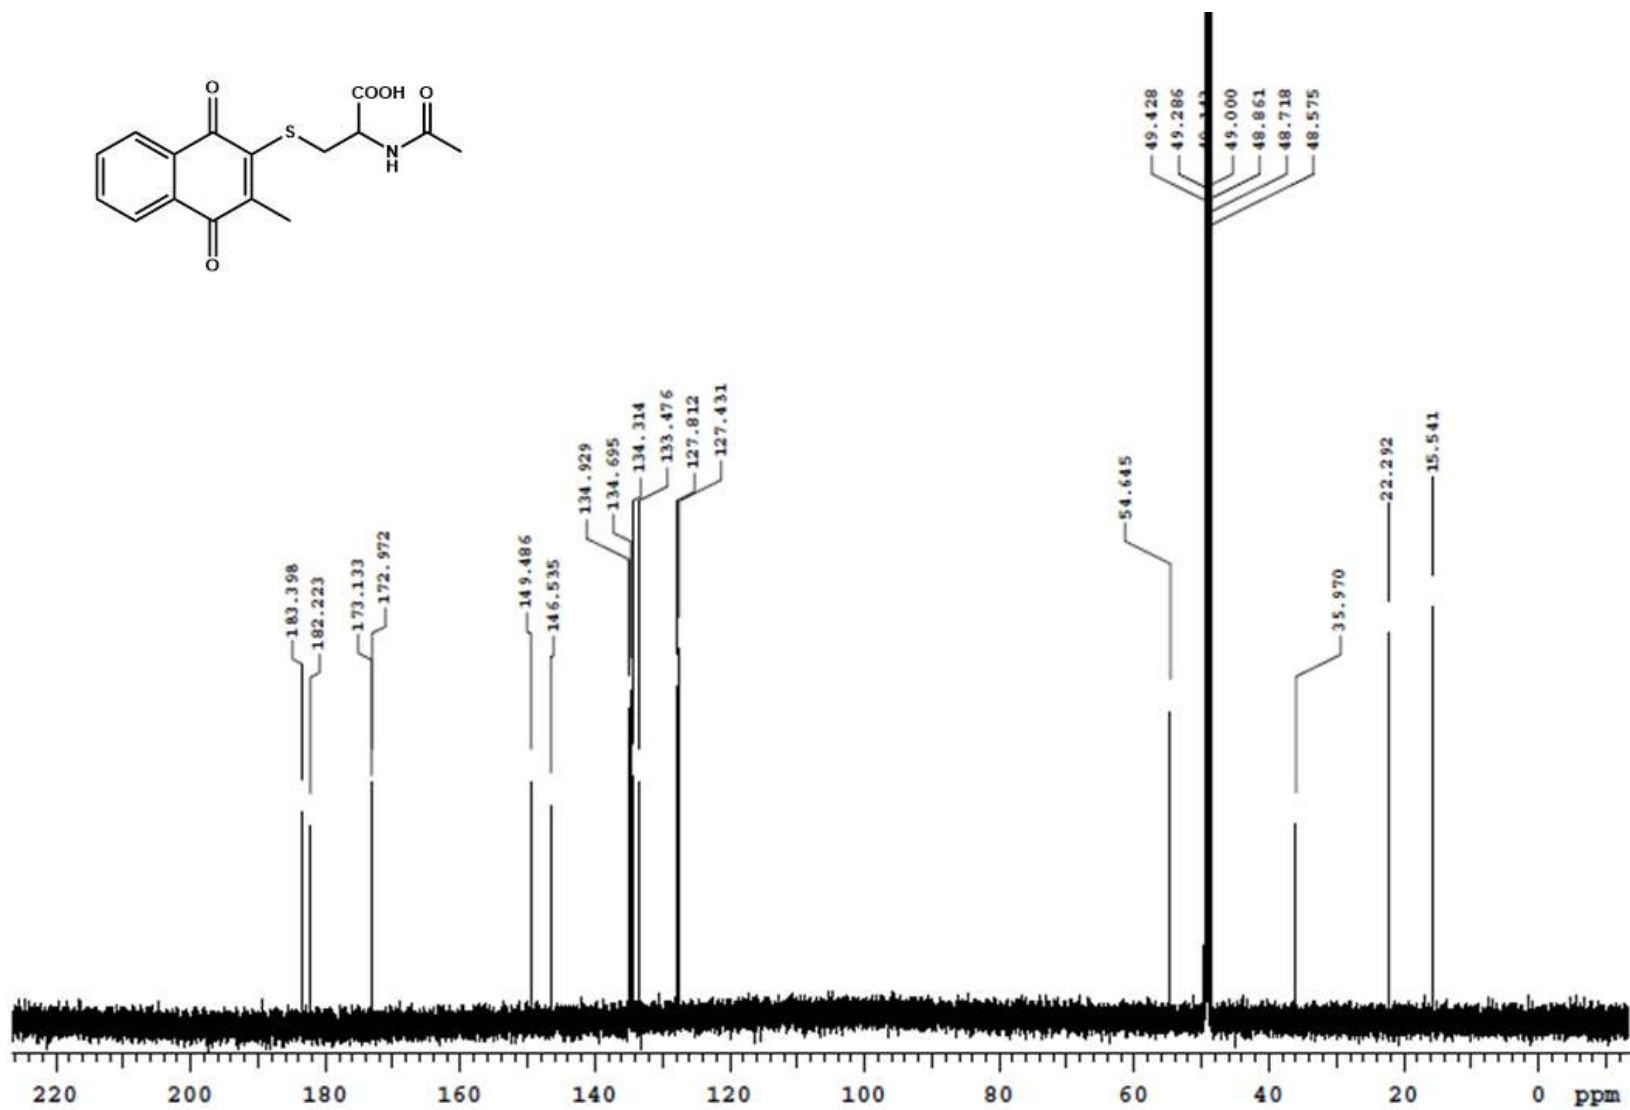

Figure S5. <sup>13</sup>C NMR spectrum in CD<sub>3</sub>OD of compound 9.

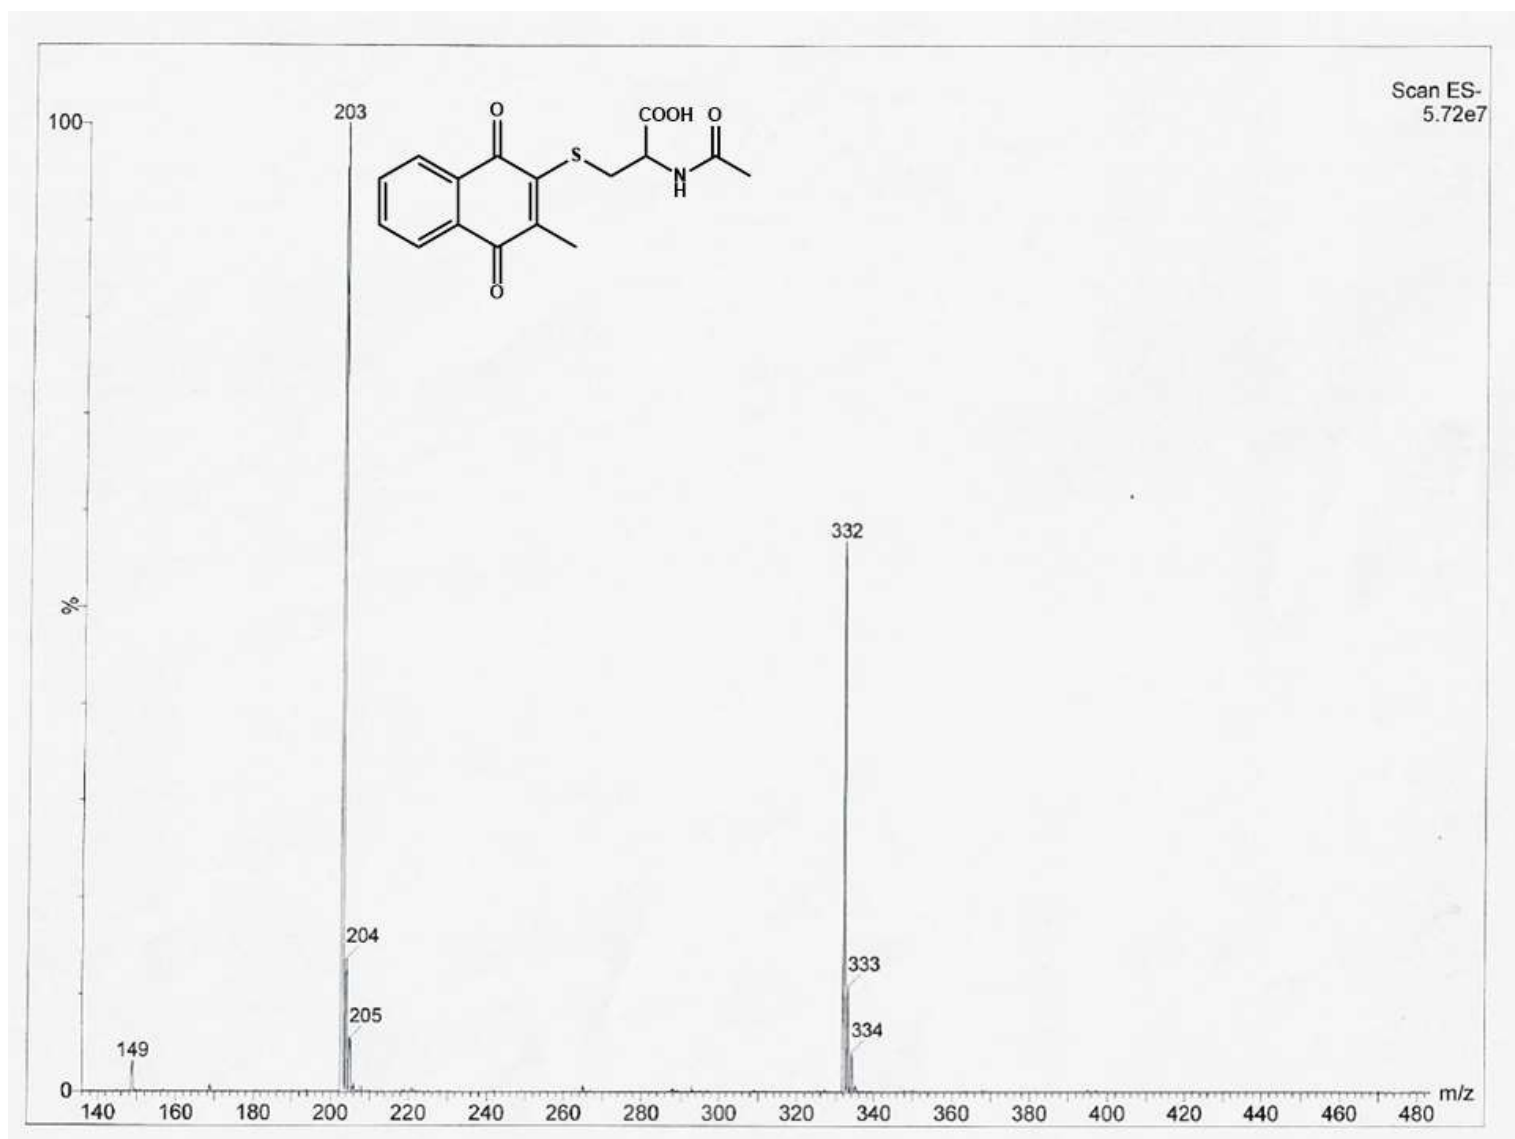

Figure S6. ESI-MS<sup>-</sup> spectrum of compound 9.



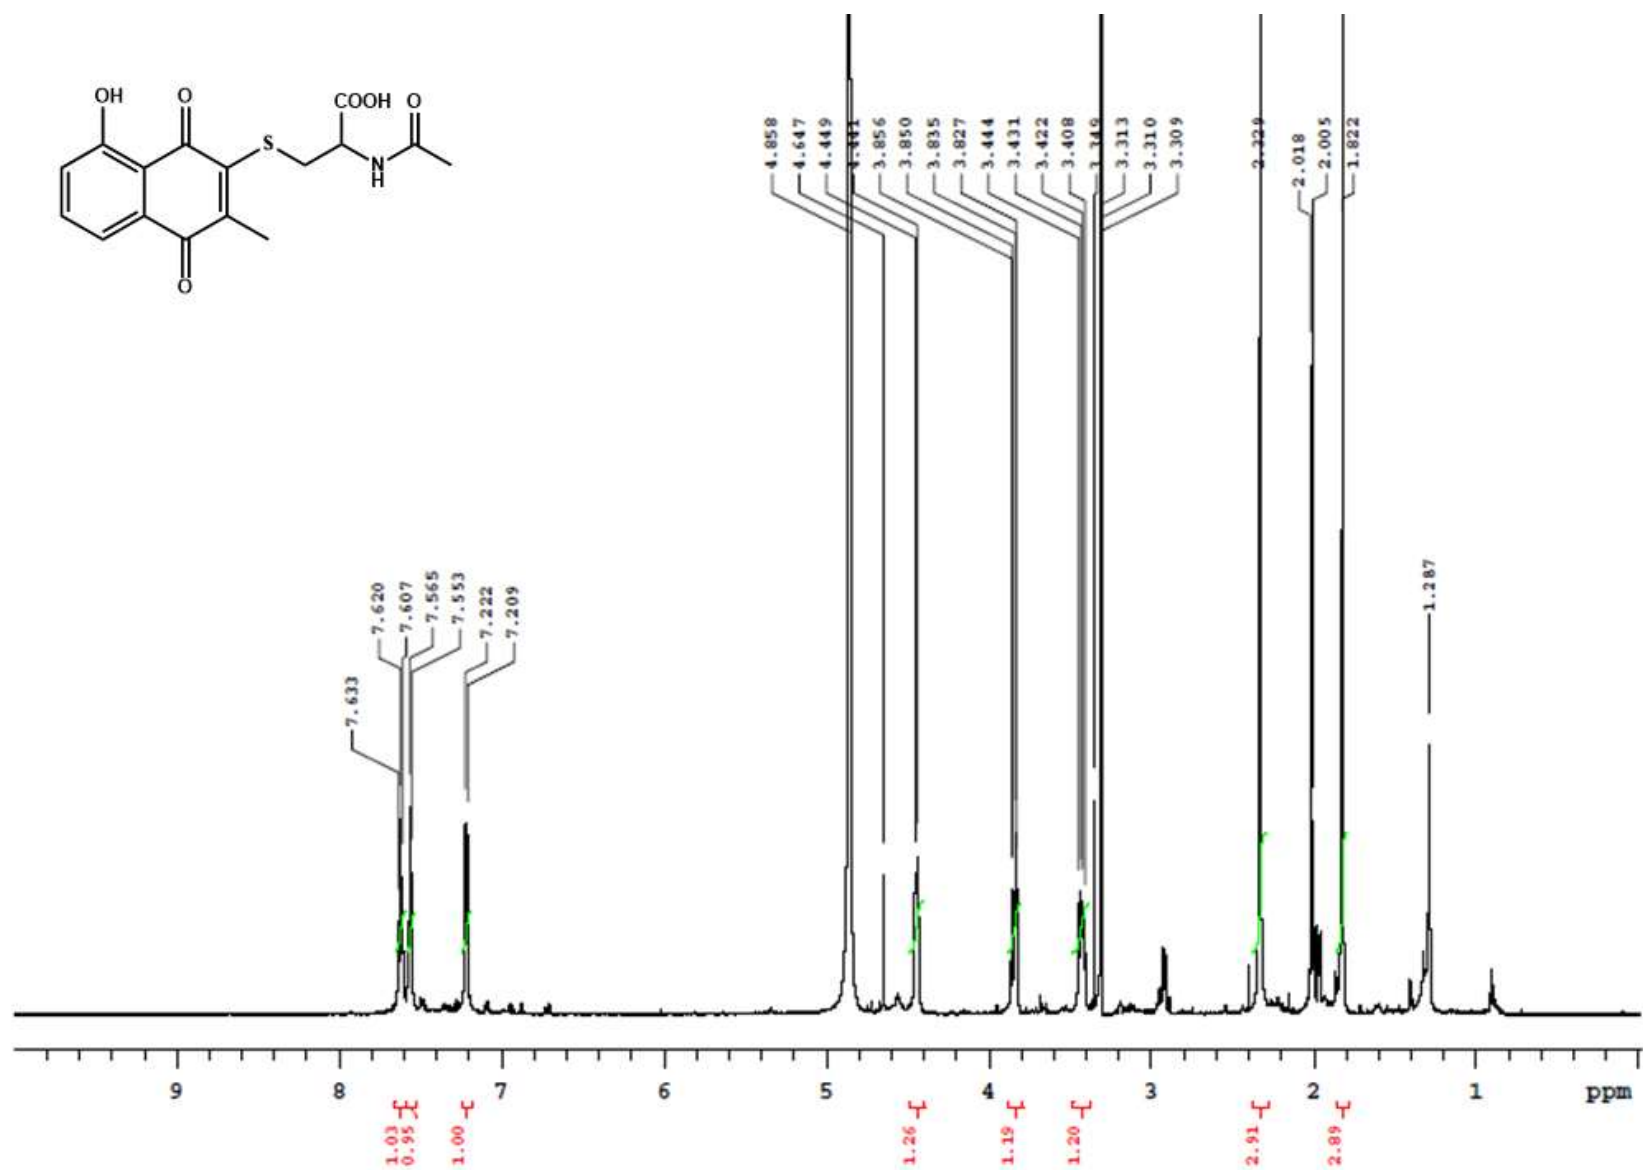

Figure S7. <sup>1</sup>H NMR spectrum in CD<sub>3</sub>OD of compound 10.

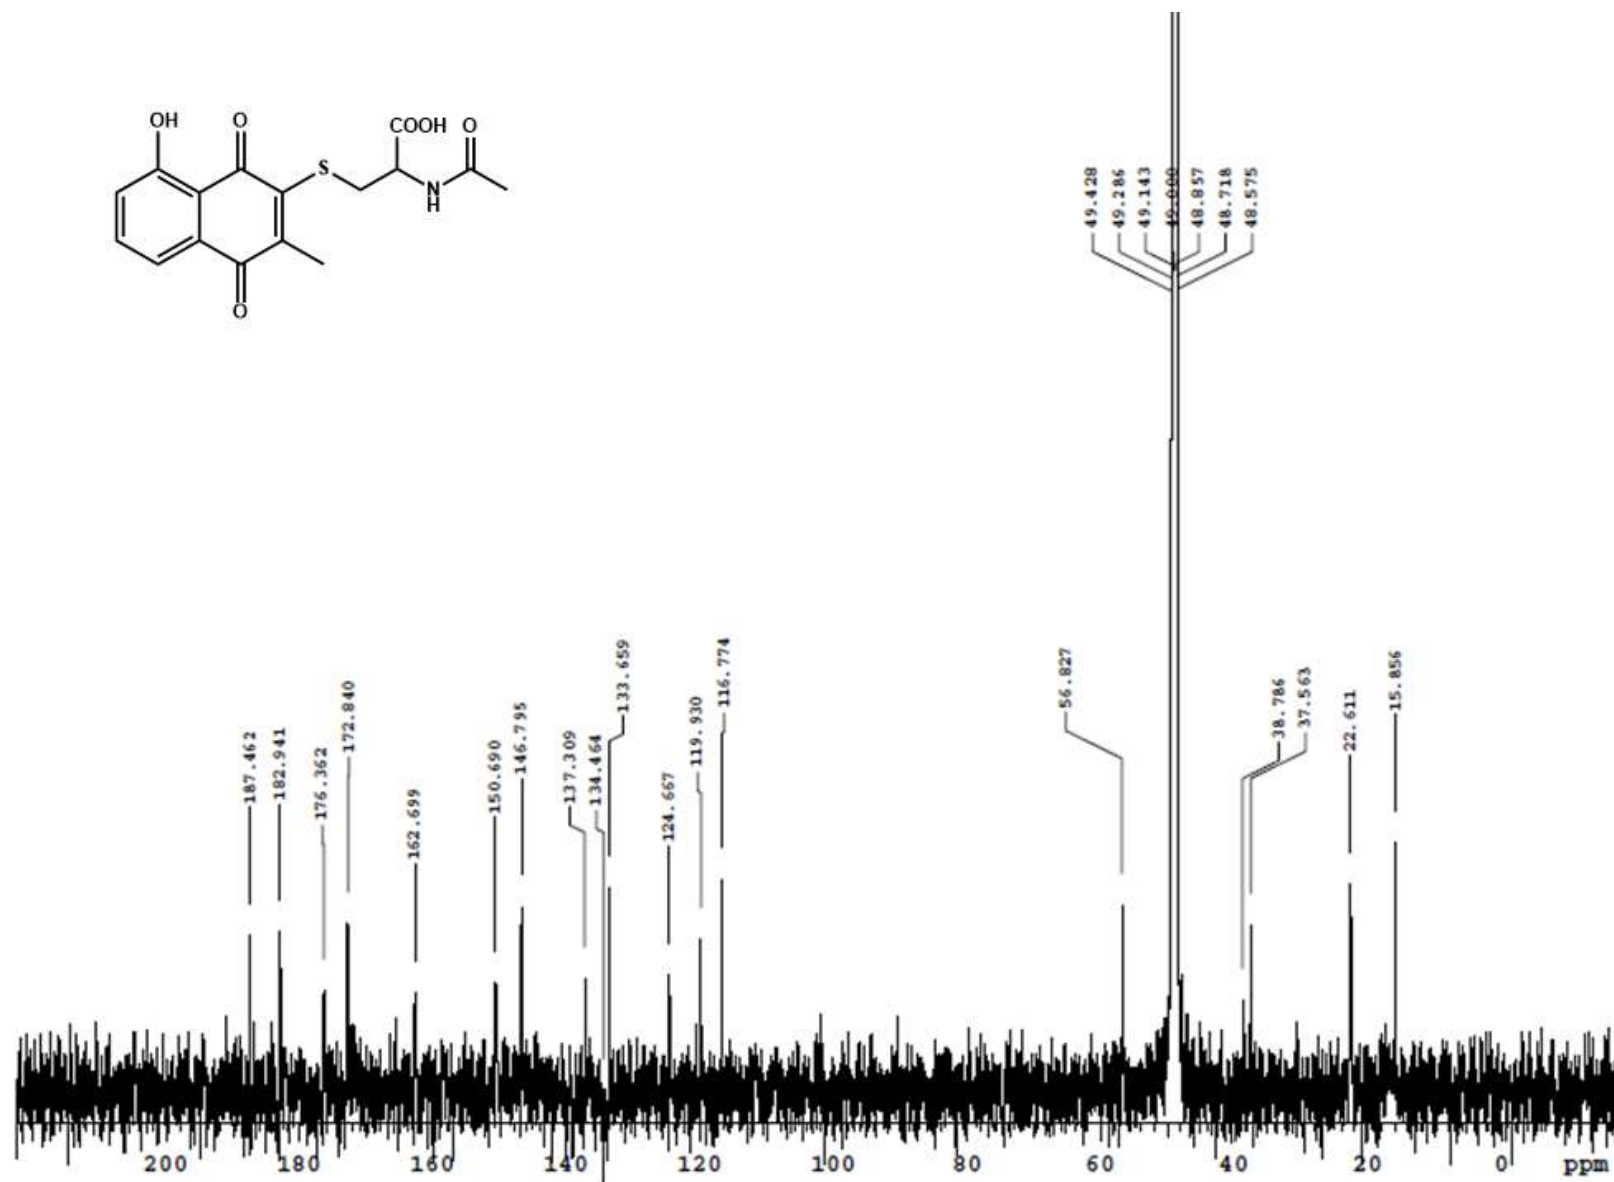

Figure S8. <sup>13</sup>C NMR spectrum in CD<sub>3</sub>OD of compound 10.

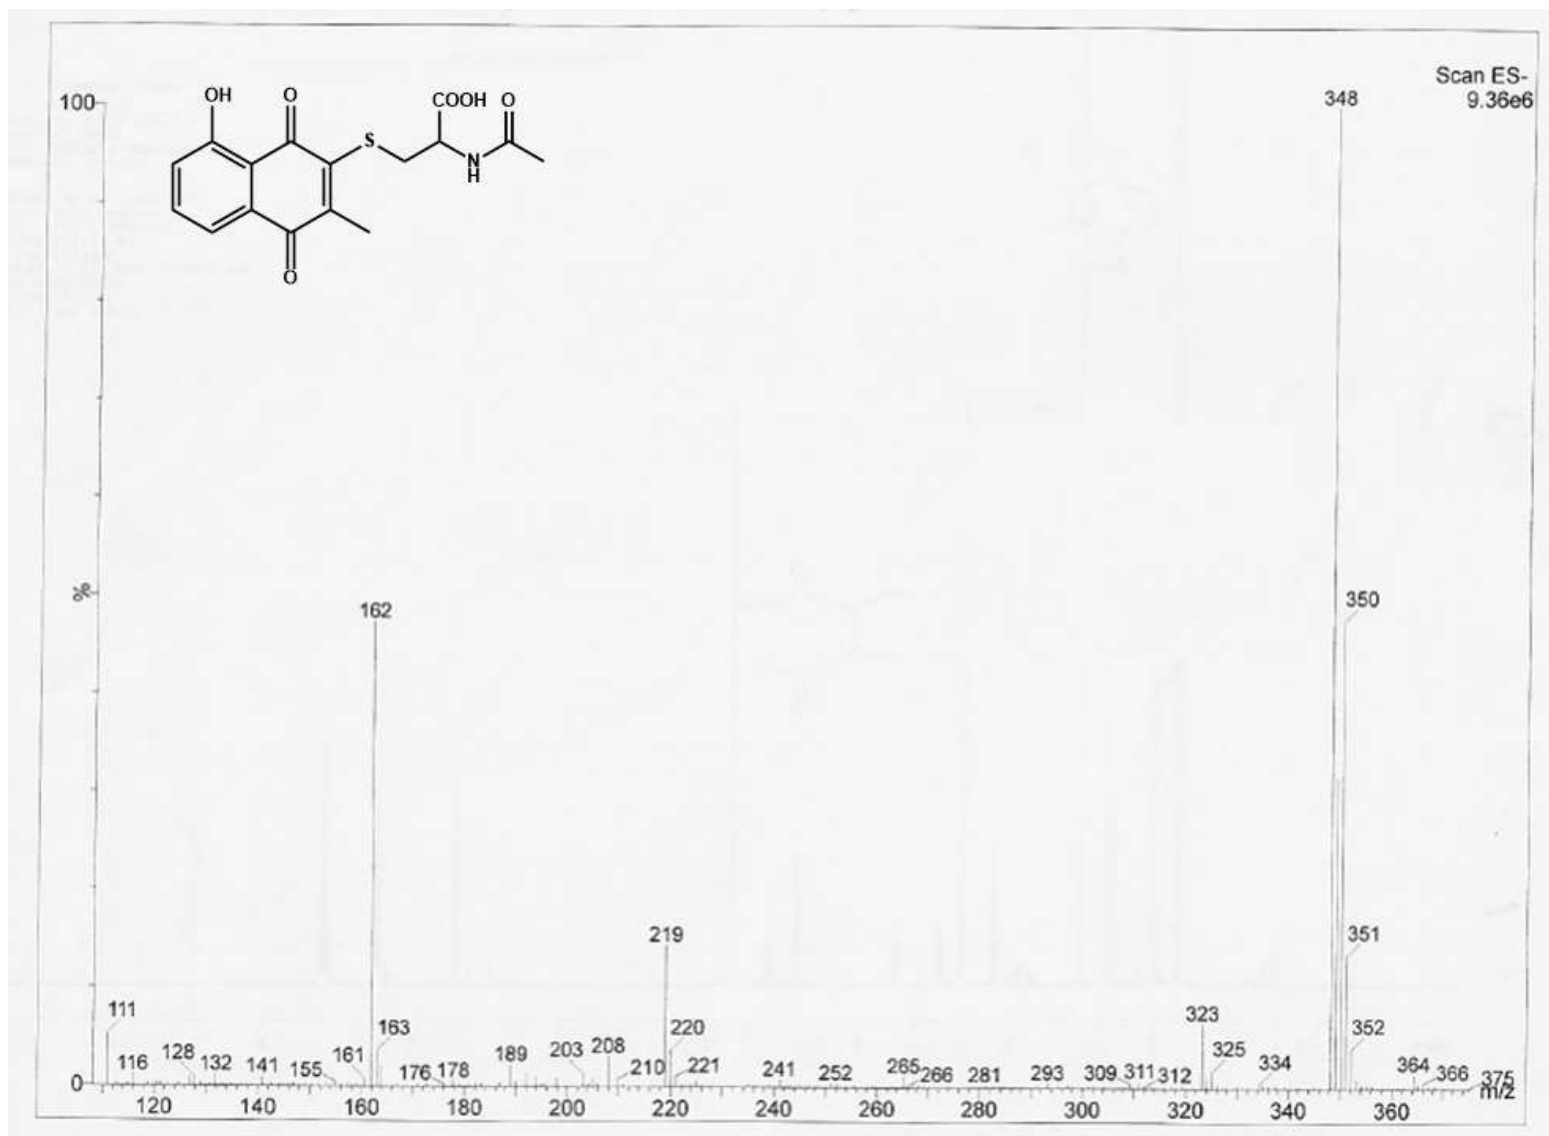

Figure S9. ESI-MS<sup>-</sup> spectrum of compound 10.

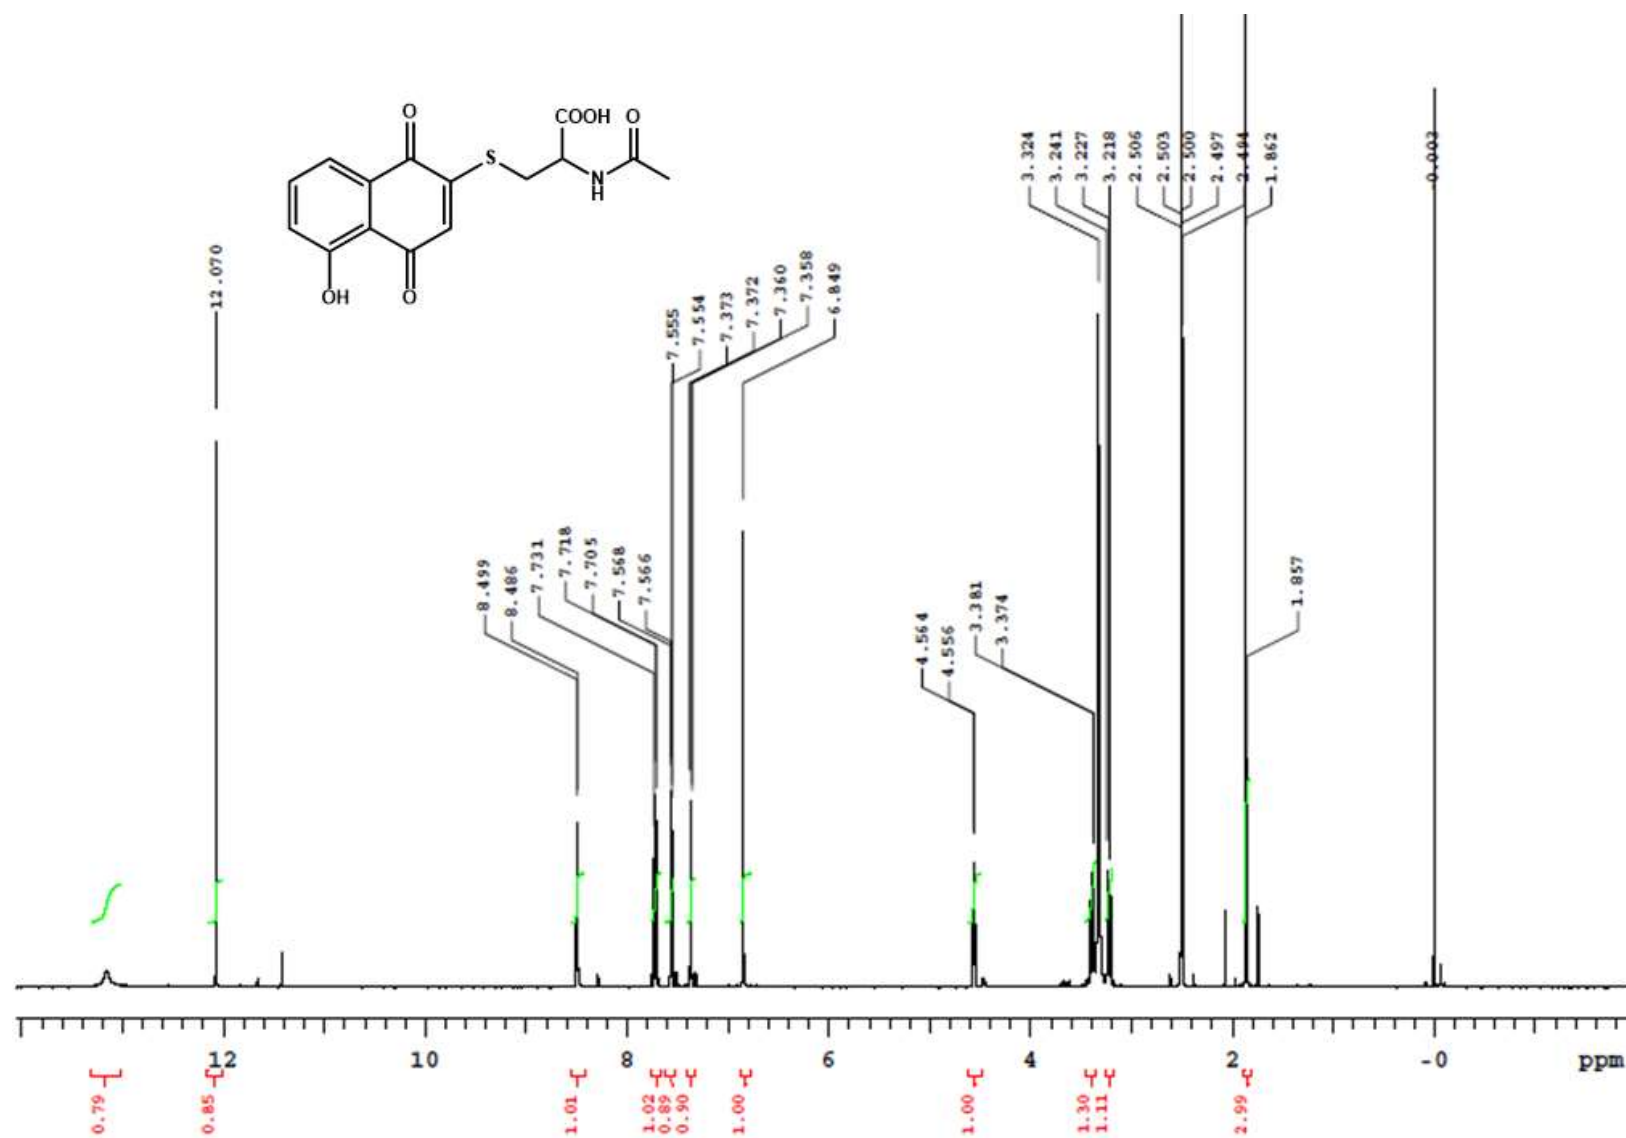

Figure S10. <sup>1</sup>H NMR spectrum in DMSO-d<sub>6</sub> of compound 11.

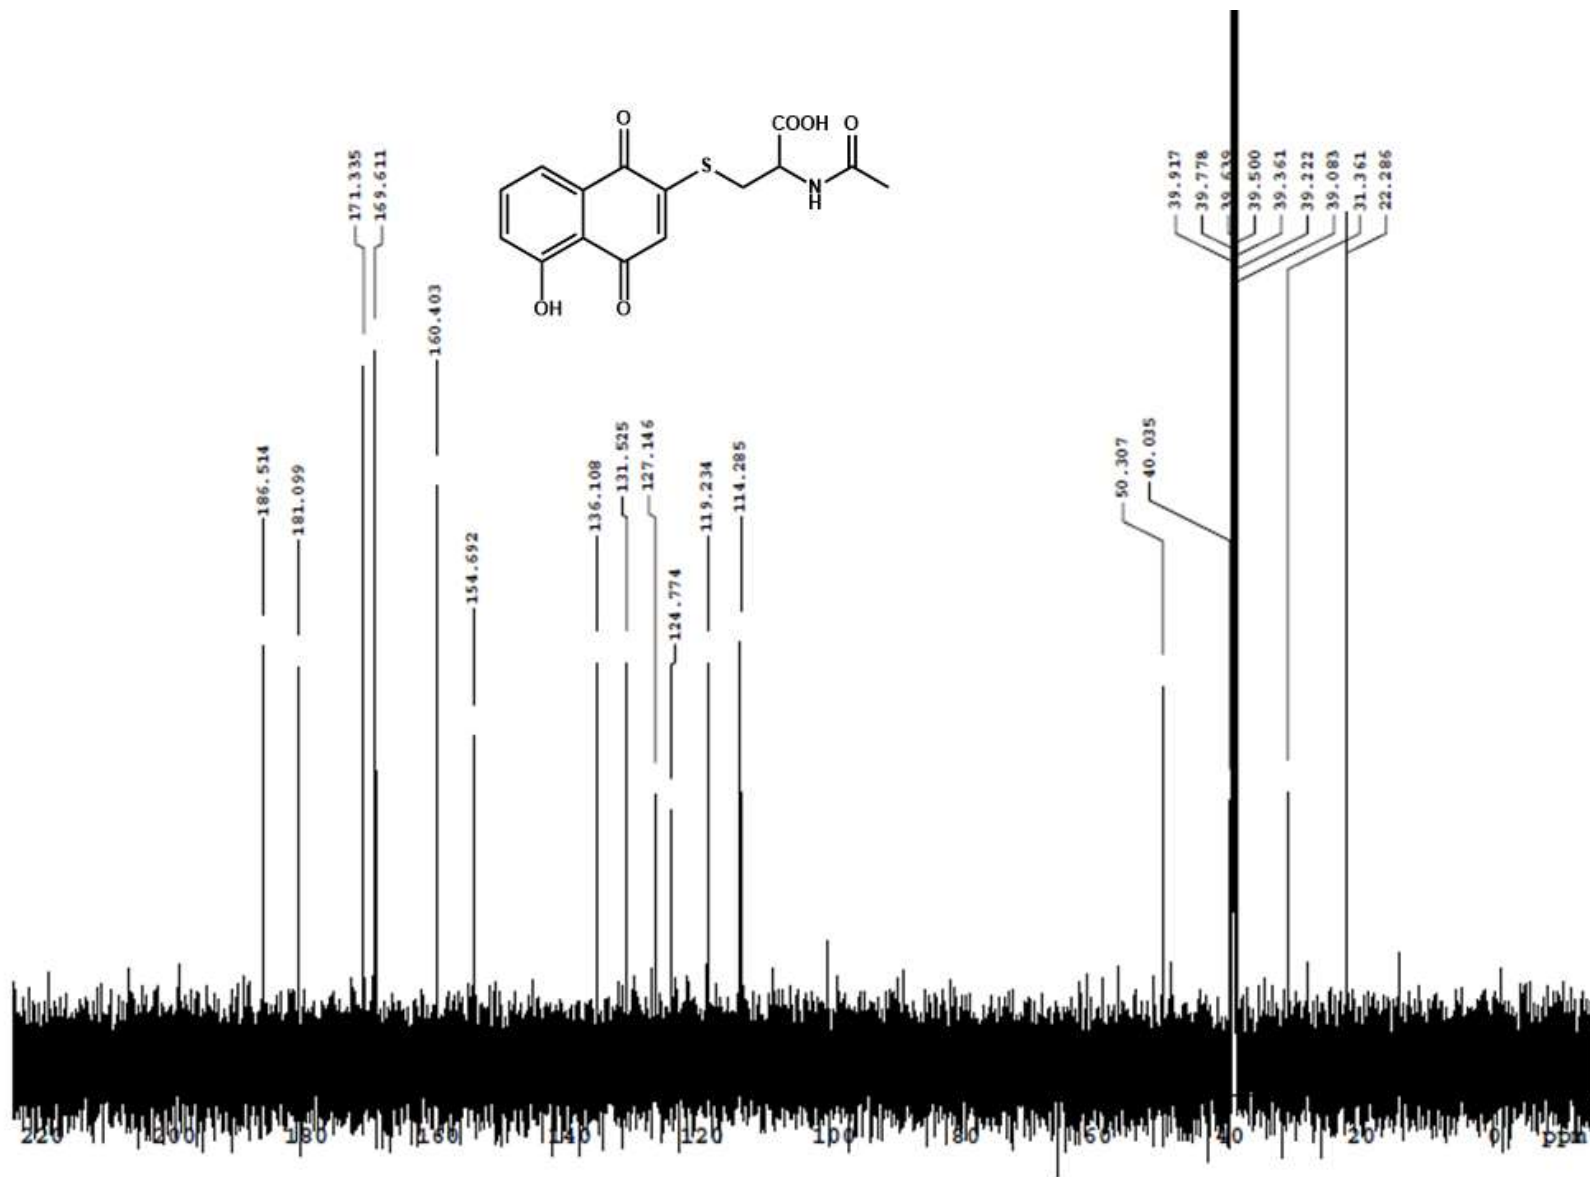

Figure S11 <sup>13</sup>C NMR spectrum in DMSO-d<sub>6</sub> of compound 11.

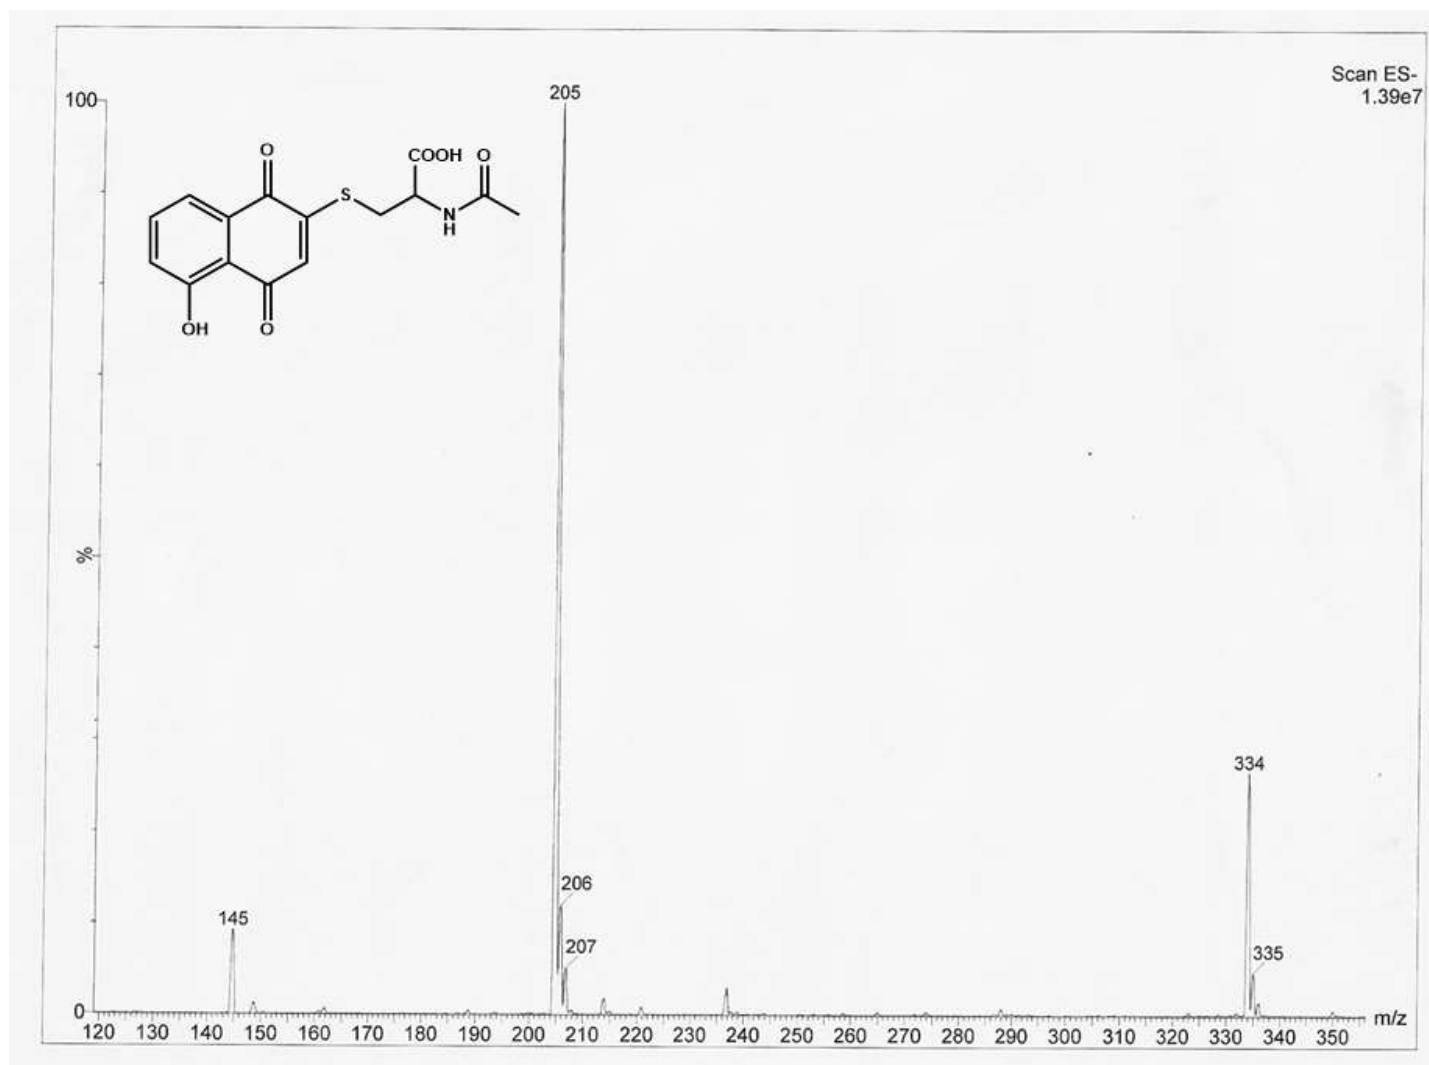

Figure S12. ESI-MS<sup>-</sup> spectrum of compound 11.

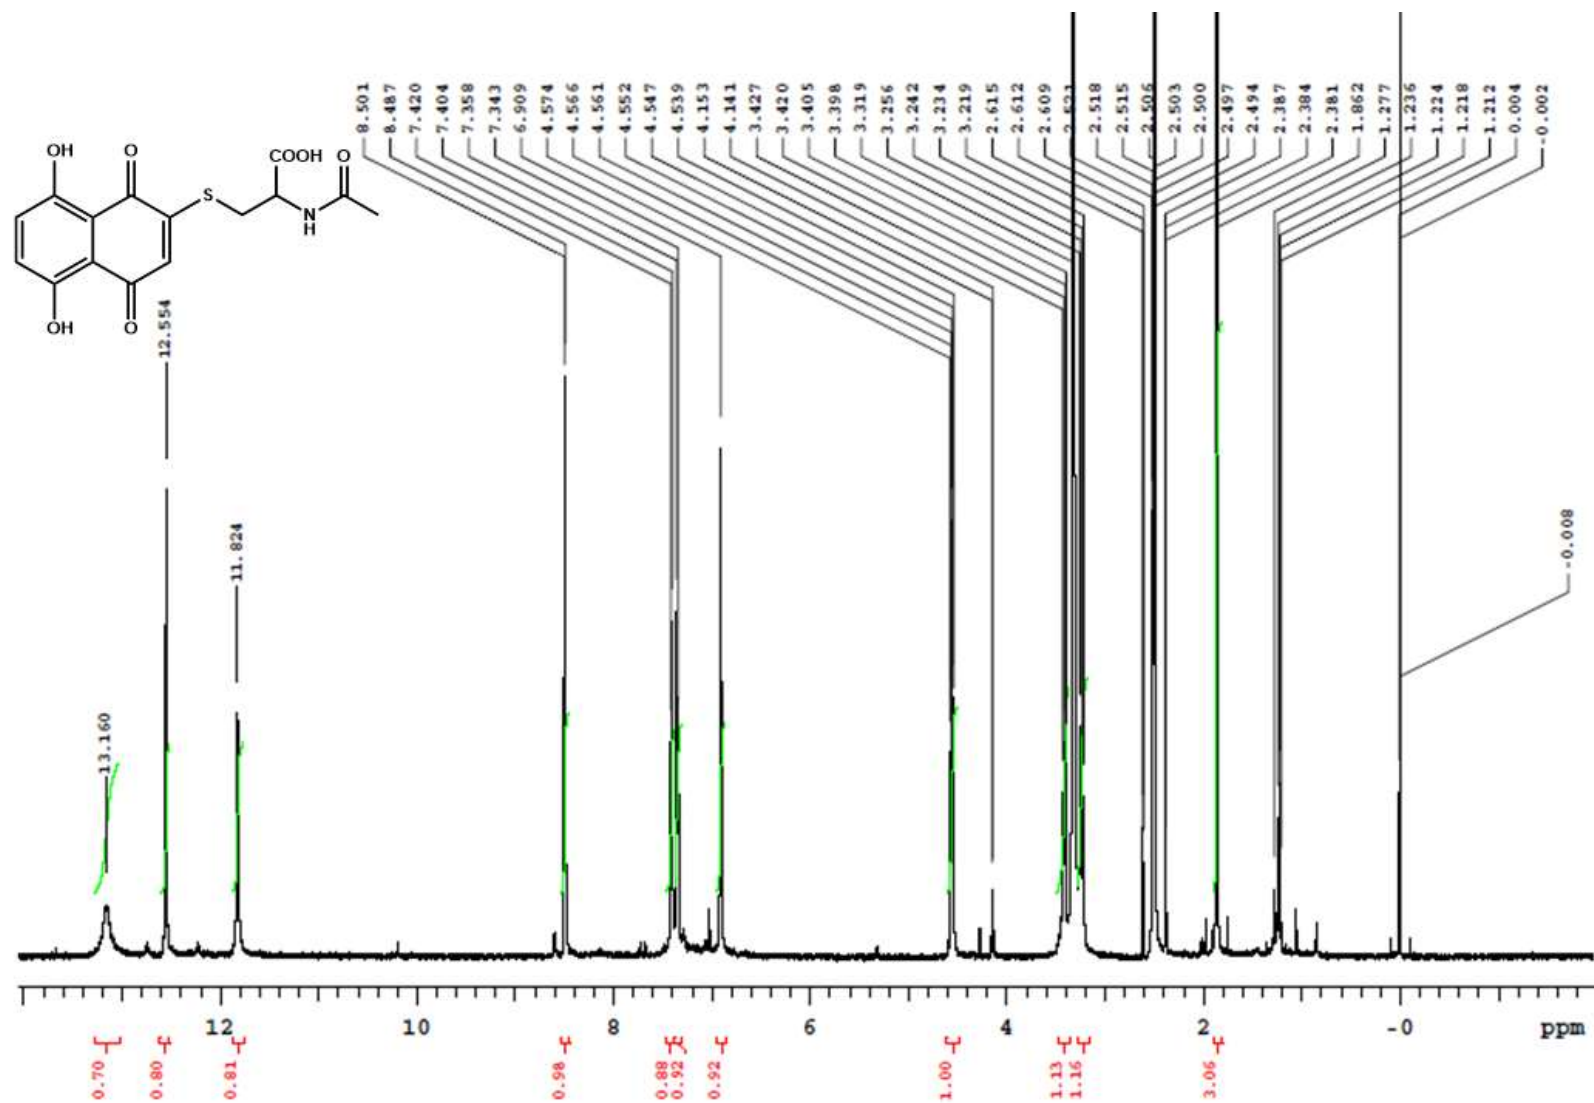

Figure S13. <sup>1</sup>H NMR spectrum in DMSO-d<sub>6</sub> of compound 12.

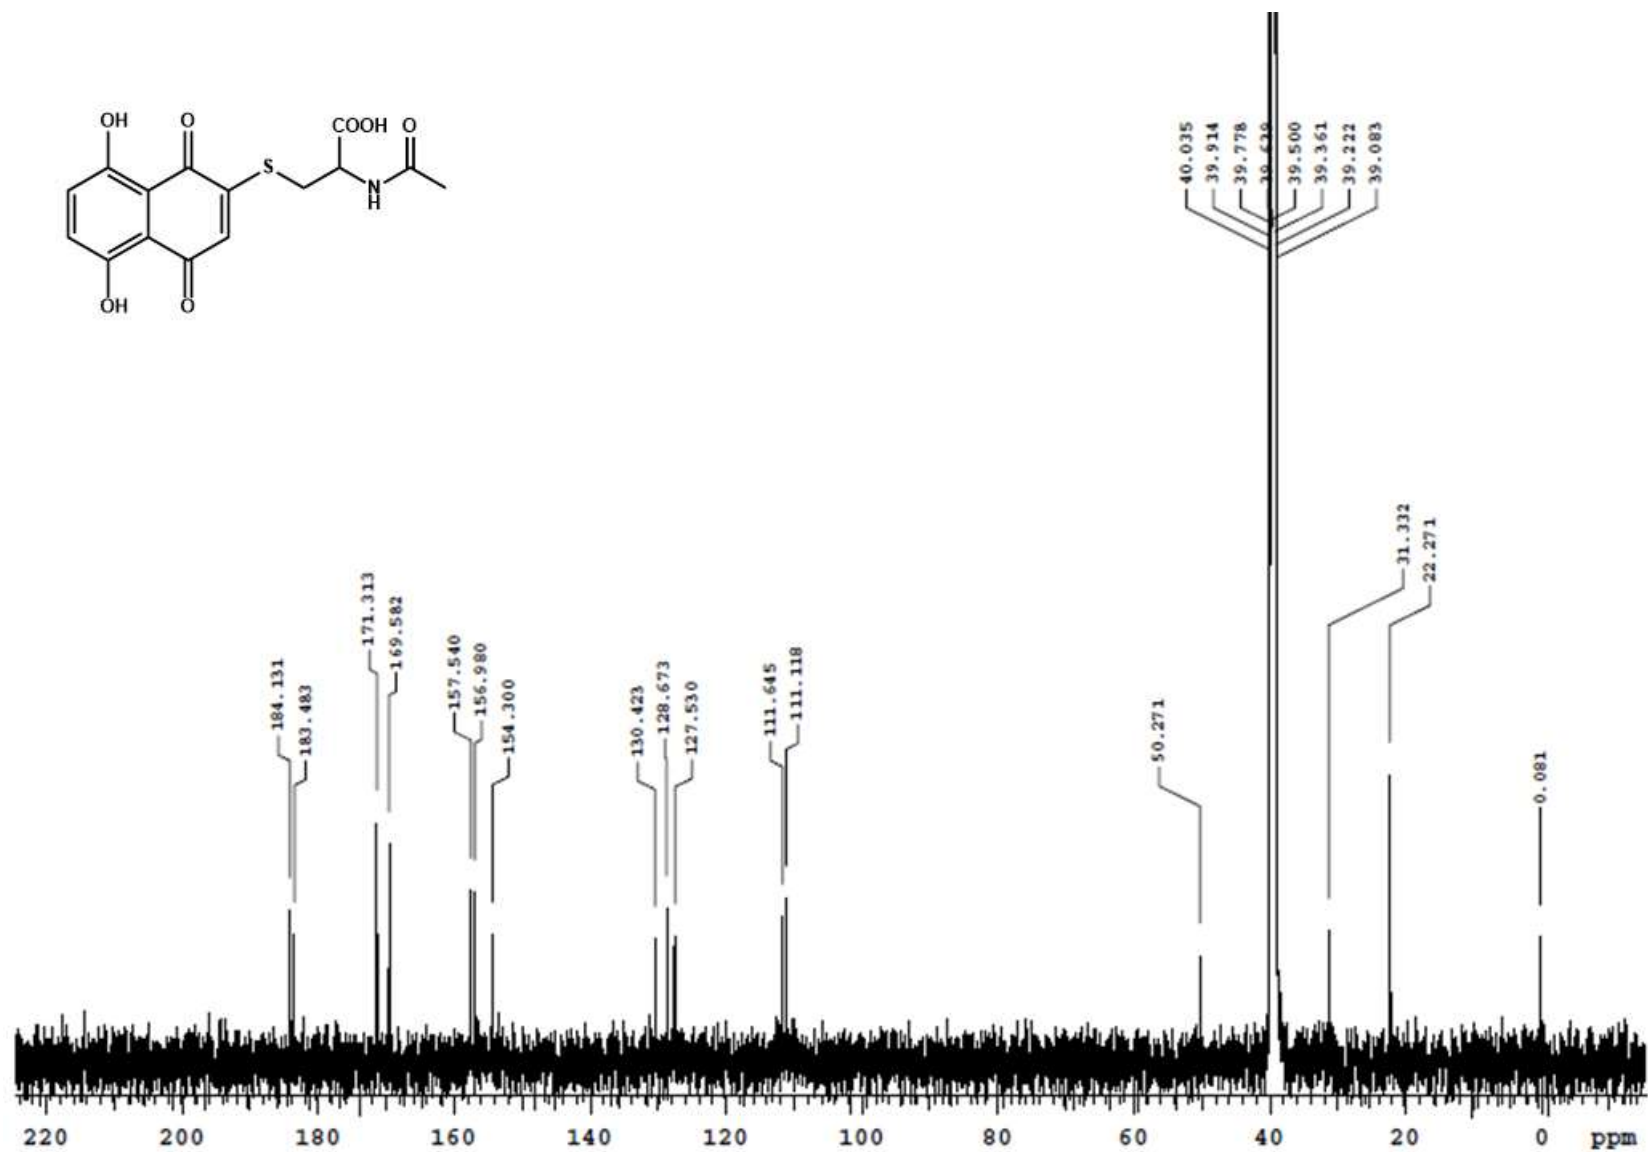

Figure S14. <sup>13</sup>C NMR spectrum in DMSO-d<sub>6</sub> of compound 12.



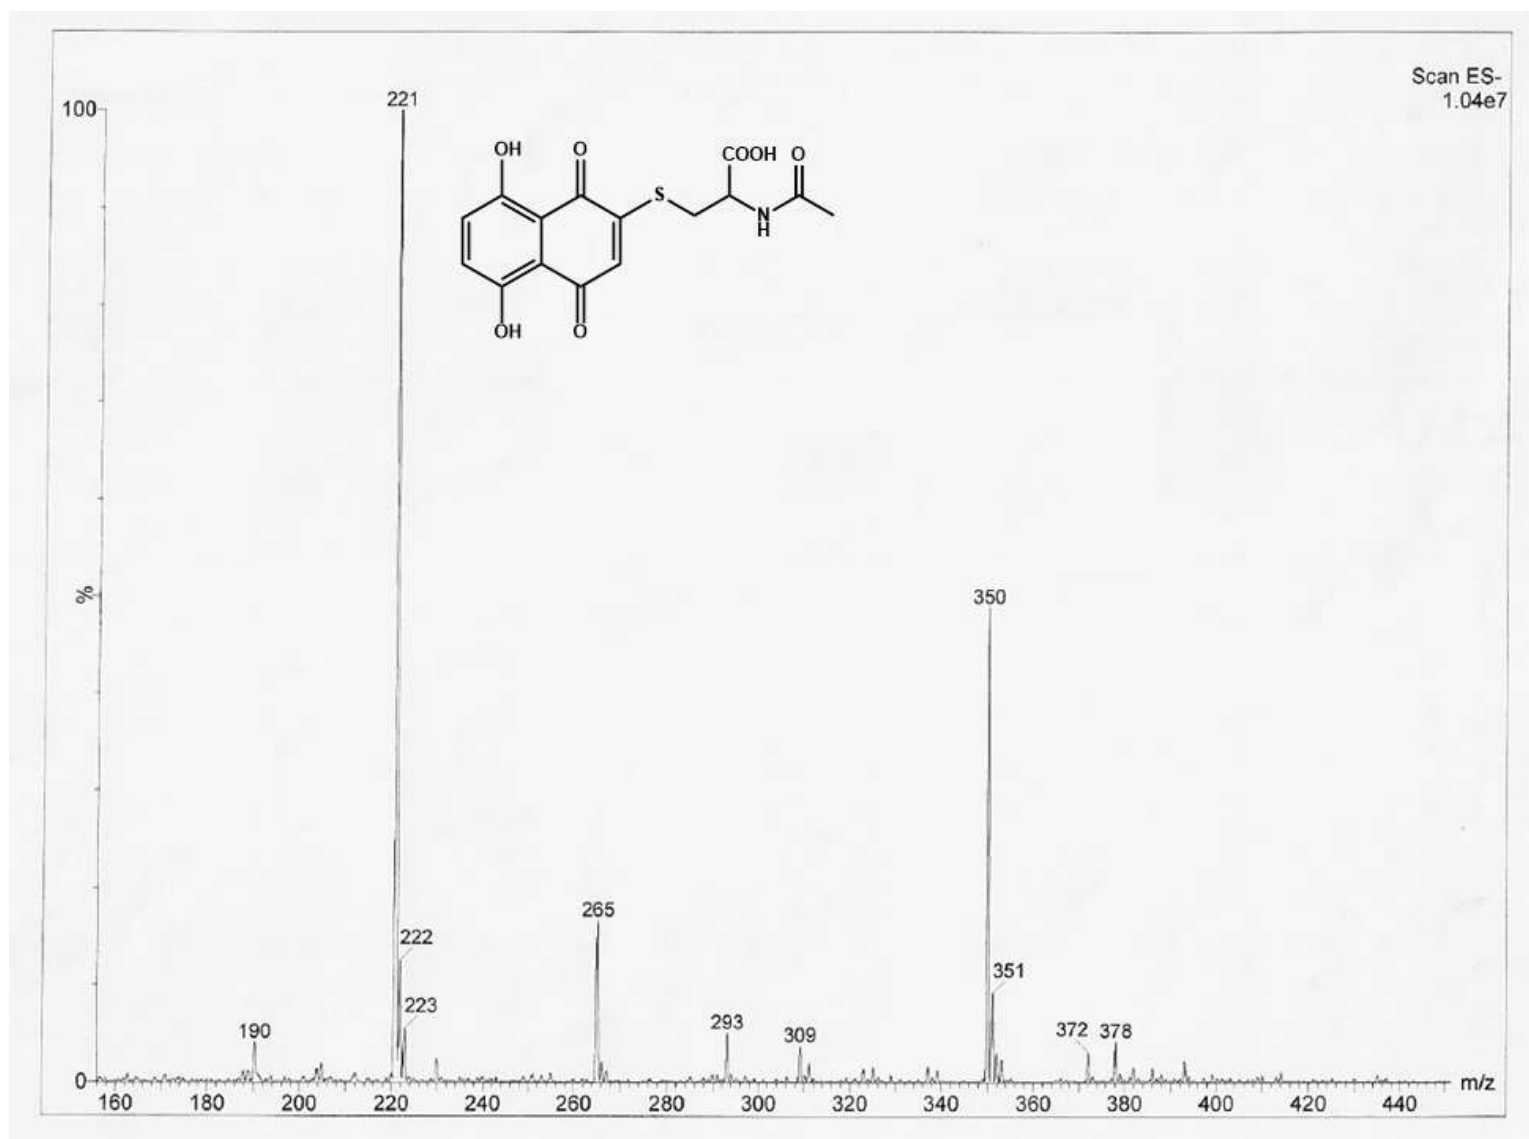

Figure S15. ESI-MS<sup>-</sup> spectrum of compound 12.

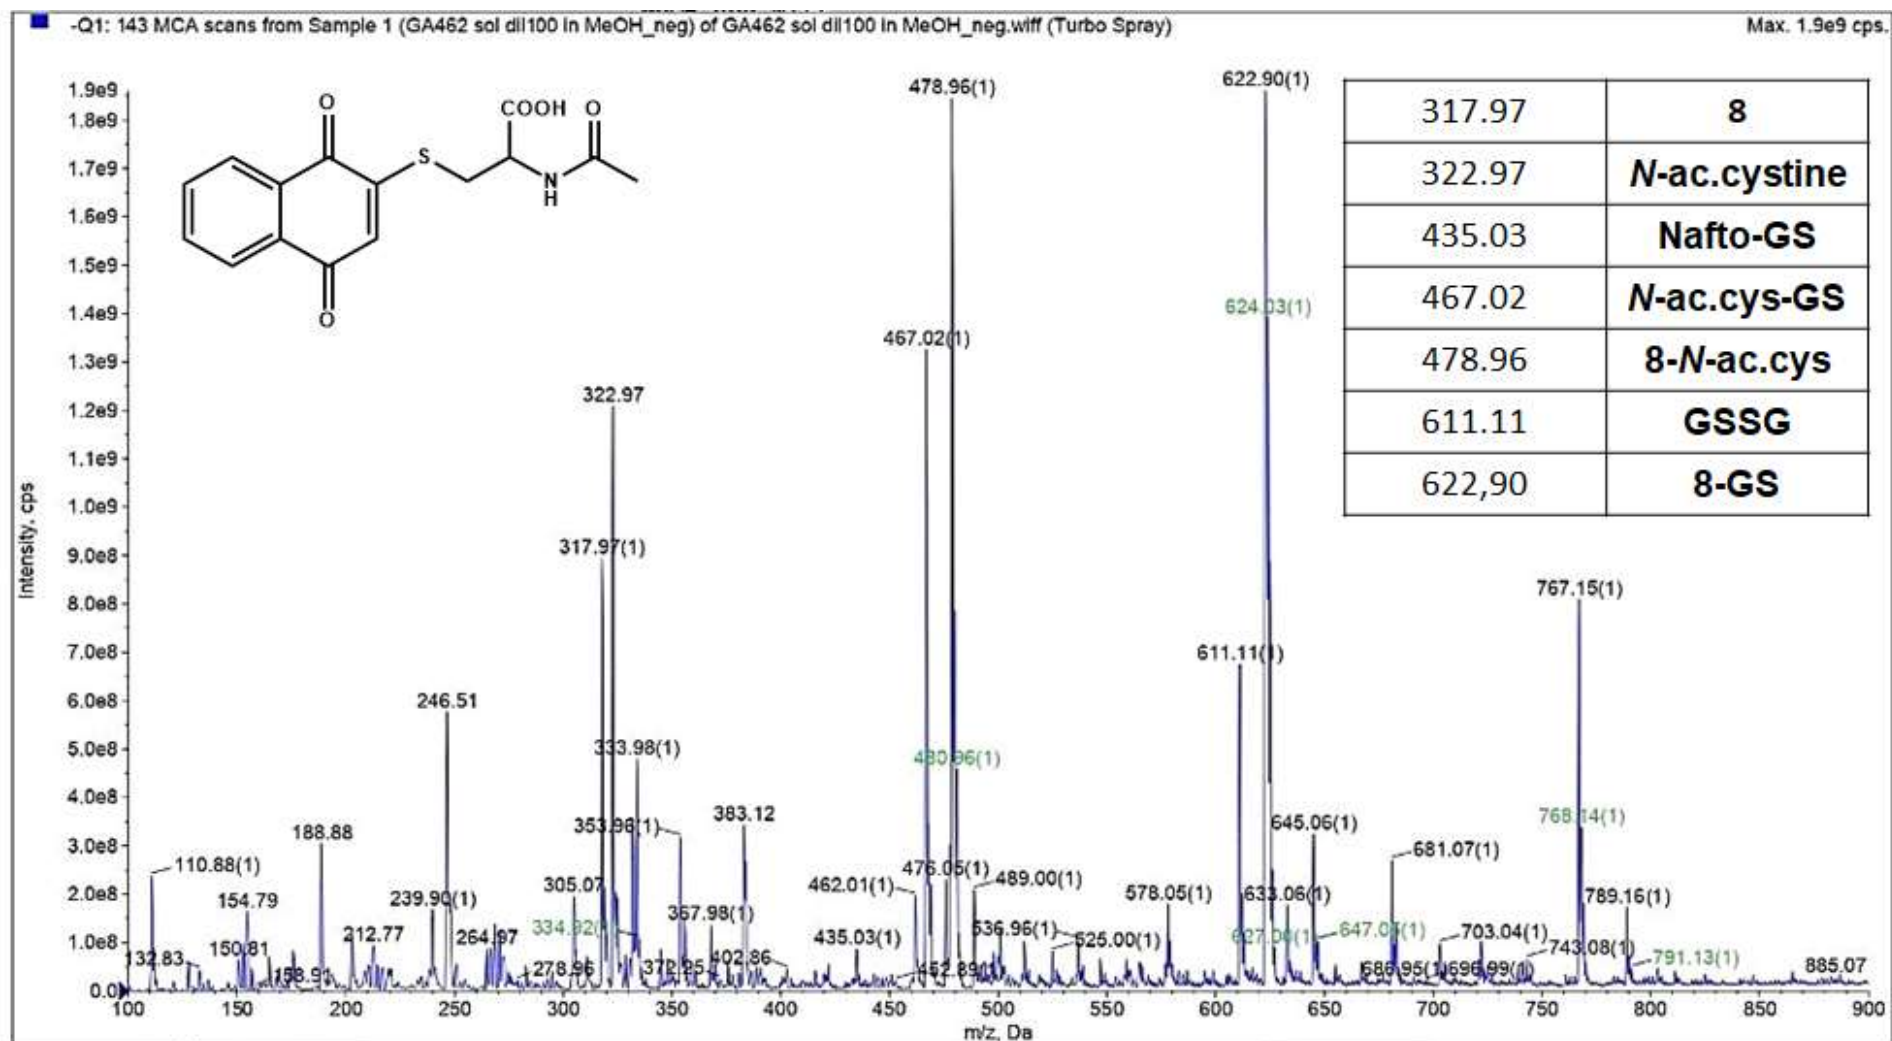

**Figure S16.** Direct infusion mass spectra of the reaction mixtures with GSH of compound **8**. All the detected ions are in the deprotonated form  $[M-H]^-$ . Abbreviations: 8-GS is the adduct of **8** with glutathione, 8-*N*-ac.cys is the adduct of **8** with *N*-acetyl-*L*-cysteine, Nafto-GS is the adduct of naphthoquinone (**1**) and glutathione, GSSG: glutathione dimer; *N*-ac.cystine is the *N*-acetyl-*L*-cysteine dimer; *N*-ac.cys-GS is the *N*-acetyl-*L*-cysteine – glutathione heterodimer.

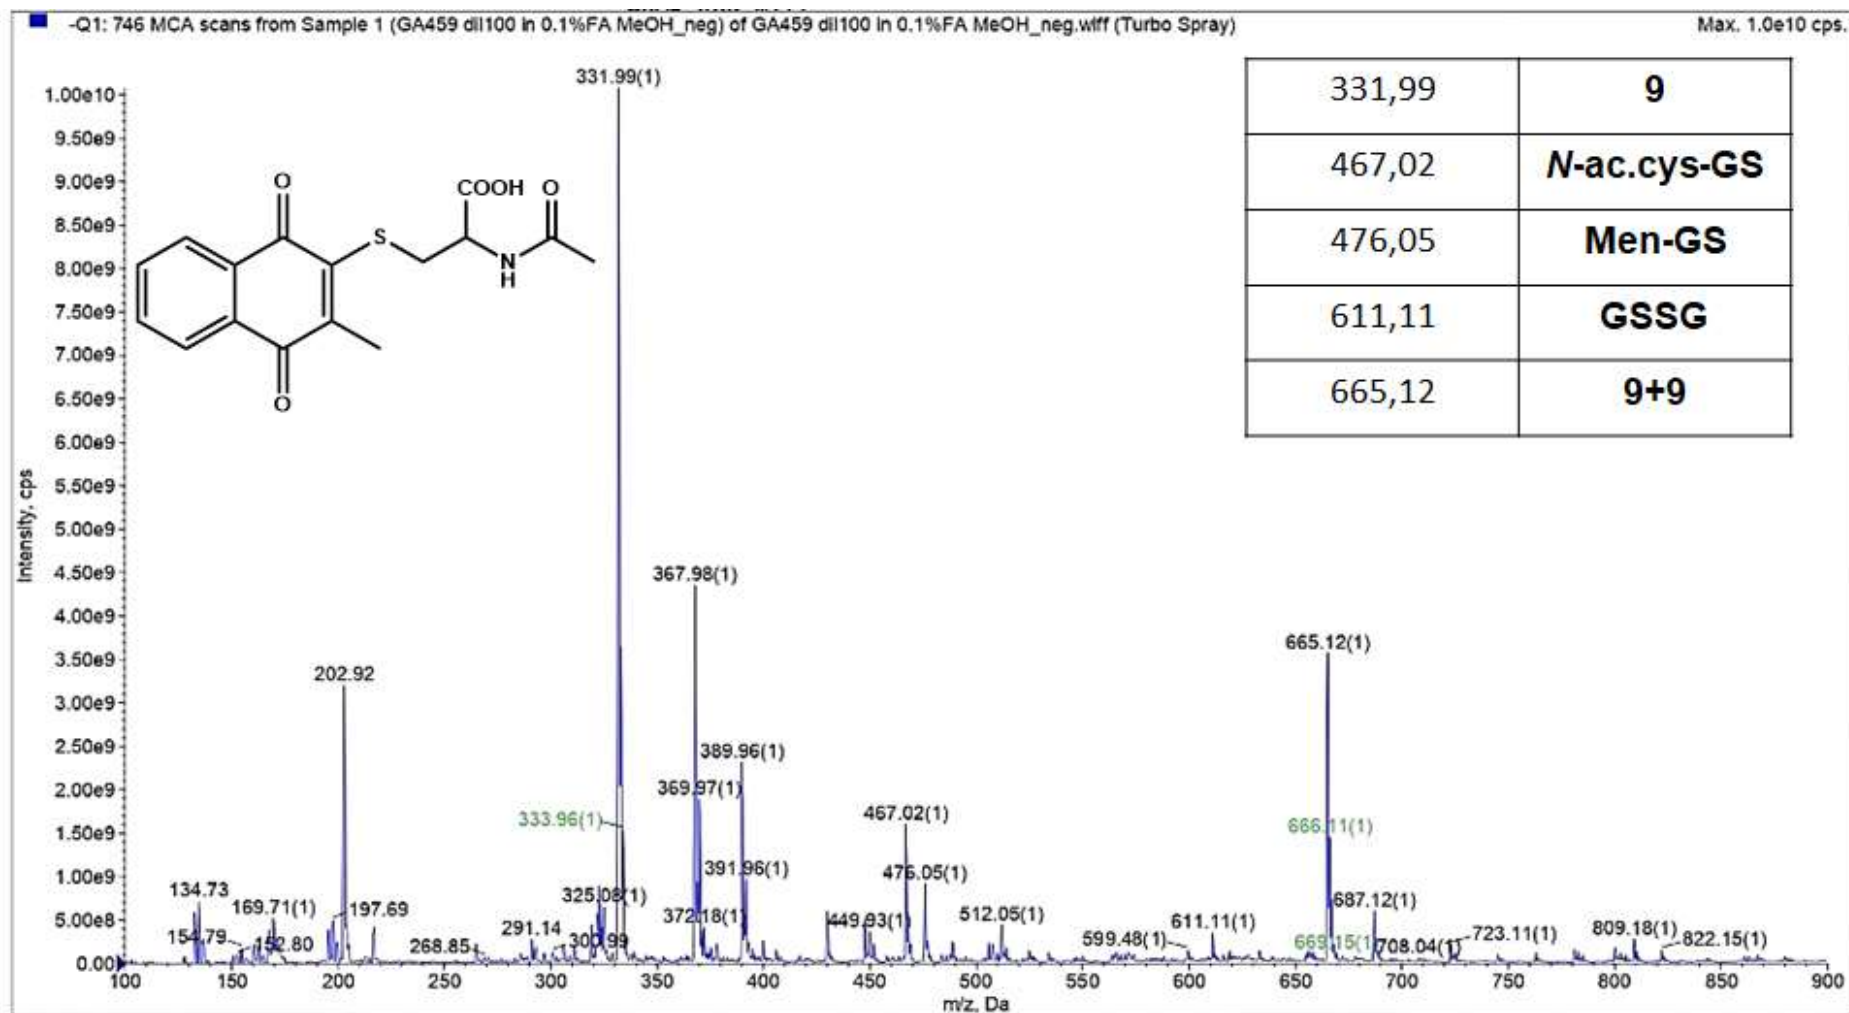

**Figure S17.** Direct infusion mass spectra of the reaction mixtures with GSH of compound **9**. All the detected ions are in the deprotonated form [M-H]<sup>-</sup>. Abbreviations: Men-GS is the adduct of Menadione (**2**) and glutathione, GSSG: glutathione dimer, *N*-ac.cys-GS is the *N*-acetyl-*L*-cysteine – glutathione heterodimer. 9+9 is the cluster of compound **9**.

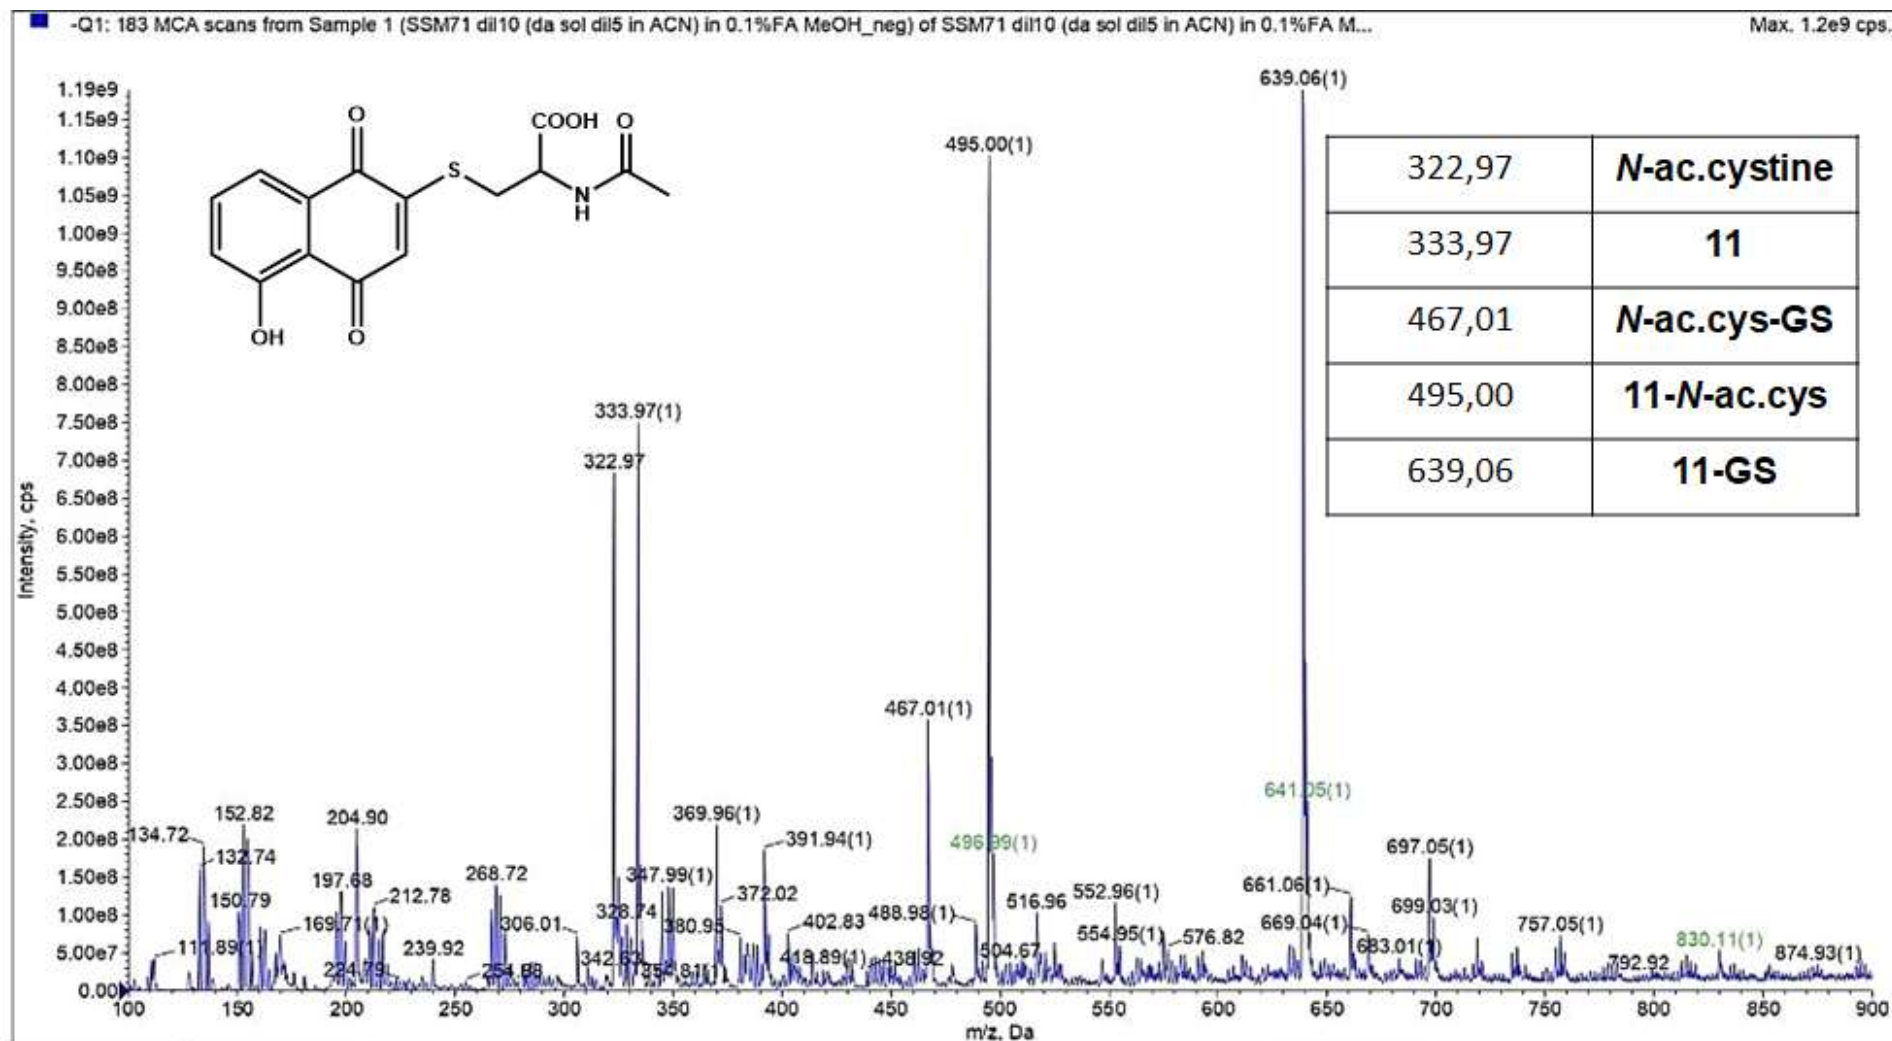

**Figure S18.** Direct infusion mass spectra of the reaction mixtures with GSH of compound **11**. All the detected ions are in the deprotonated form  $[M-H]^-$ . Abbreviations: 11-GS is the adduct of **11** with glutathione, 11-N-ac.cys is the adduct of **11** with *N*-acetyl-*L*-cysteine, *N*-ac.cystine is the *N*-acetyl-*L*-cysteine dimer; *N*-ac.cys-GS is the *N*-acetyl-*L*-cysteine – glutathione heterodimer.
